# Supplementary material for: Trivalent scandium, yttrium and lanthanide complexes with thia-oxa and selena-oxa macrocycles and crown ether coordination
Source: Royal Society of Chemistry journal article supplement (doi:10.1039/c3dt51405f), 2013-01-01
Supplement: c3dt51405f.pdf [file c3dt51405f.pdf]

## ESI

# Trivalent Scandium, Yttrium and Lanthanide Complexes with Thia-oxa and Seleno-oxa Macrocycles and Crown Ether Coordination

Martin J. D. Champion, Paolo Farina, William Levason\* and Gillian Reid

### Preparations:

**[LaI<sub>3</sub>(15-crown-5)]:** To a Schlenk flask containing a suspension of LaI<sub>3</sub> (0.150 g, 0.29 mmol) in MeCN (10 mL) was added a solution of 15-crown-5 (0.070 g, 0.32 mmol) in MeCN (10 mL). A white precipitate began forming immediately and the suspension was stirred for a further 30 mins. The precipitate was filtered off and dried under vacuum. Yield: 0.110 g, 52%. Required for C<sub>10</sub>H<sub>20</sub>I<sub>3</sub>LaO<sub>5</sub>·0.5MeCN (760.4): C, 17.4; H, 2.9; N, 0.9. Found: C, 17.7; H, 3.6; N, 0.7%. <sup>1</sup>H NMR (CD<sub>3</sub>CN, 295 K): δ = 4.29 (m, [10H]) 4.10 (m, [10H]).

**[LaI<sub>3</sub>(18-crown-6)]:** To a Schlenk flask containing a suspension of LaI<sub>3</sub> (0.10 g, 0.19 mmol) in dichloromethane (30 mL) was added a solution of 18-crown-6 (0.051 g, 0.19 mmol) in dichloromethane (30 mL). The solution was stirred for 72 h and the residual solid filtered off. The filtrate was taken to dryness under vacuum. The residue was washed with diethyl ether (10mL) leaving a yellow powder. Yield 0.06 g, 40%. Required for C<sub>12</sub>H<sub>24</sub>I<sub>3</sub>LaO<sub>6</sub> (783.9): C, 18.4; H, 3.1. Found: C, 18.5; H, 3.2%. <sup>1</sup>H NMR (CD<sub>2</sub>Cl<sub>2</sub>, 295 K): δ = 4.26 (s).

**[LaI<sub>2</sub>(18-crown-6)]PF<sub>6</sub>:** To a Schlenk flask containing a suspension of LaI<sub>3</sub> (0.150 g, 0.29 mmol) in MeCN (10 mL) was added a solution of 18-crown-6 (0.076 g, 0.29mmol) in MeCN (10 mL). The solution was stirred for 1 h after which a small amount of extremely fine solid was filtered off. [NH<sub>4</sub>]<sup>+</sup>PF<sub>6</sub><sup>-</sup> (0.047 g, 0.29 mmol) in methanol (3 mL) was added and stirred for a further 1 h. The solvent volume was reduced by half, diethyl ether (20 mL) was added and the solution placed in the freezer overnight. This produced a white powder which was collected by filtration and dried under vacuum. Yield: 0.165 g, 71%. Required for C<sub>12</sub>H<sub>24</sub>F<sub>6</sub>I<sub>2</sub>LaO<sub>6</sub>P (802.0): C, 18.0; H, 3.0. Found: C, 17.7; H, 3.6%. <sup>1</sup>H NMR (CD<sub>3</sub>CN, 295 K): δ = 4.17 (s). <sup>19</sup>F{<sup>1</sup>H} NMR (CD<sub>3</sub>CN, 295 K): δ = -72.3 (d, <sup>1</sup>J<sub>FP</sub> = 702 Hz). Λ<sub>M</sub> MeCN 10<sup>-3</sup> mol dm<sup>-3</sup> = 272 Ω<sup>-1</sup> cm<sup>2</sup> mol<sup>-1</sup>. IR (Nujol/ cm<sup>-1</sup>): 845 (vs), 558(m) (PF<sub>6</sub>).

**[LuI<sub>2</sub>(15-crown-5)]I:** To a Schlenk flask containing a suspension of LuI<sub>3</sub> (0.075 g, 0.135 mmol) in MeCN (5 mL) was added a solution of 15-crown-5 (0.036 g, 0.135 mmol) in MeCN (5 mL). The solution was stirred for 1 h after which a small amount of extremely fine precipitate was filtered off. Diethyl ether (10 mL) was layered onto the solution. Colourless crystals were deposited overnight, along with some powdered material. The solid was collected by filtration and dried under vacuum. Yield: 0.122 g, 58%. Required for C<sub>10</sub>H<sub>20</sub>I<sub>3</sub>LuO<sub>5</sub> (776.0): C, 15.5; H, 2.6. Found: C, 15.5; H, 2.5%. <sup>1</sup>H NMR (CD<sub>3</sub>CN, 295 K): δ = 4.39 (s).

**[LuI(18-crown-6)(MeCN)<sub>2</sub>]<sub>2</sub>I<sub>2</sub>**: was made similarly from LuI<sub>3</sub> (0.075 g, 0.135 mmol) and 18-crown-6 (0.036 g, 0.135 mmol). Yield: 0.055 g, 45%. Required for C<sub>16</sub>H<sub>30</sub>N<sub>2</sub>I<sub>3</sub>LuO<sub>6</sub> (861.1): C, 21.3; H, 3.4; N, 3.1. Found: C, 21.5; H, 3.5; N, 3.2%. <sup>1</sup>H NMR (CD<sub>3</sub>CN, 295 K): δ = 4.22 (s). IR (Nujol/ cm<sup>-1</sup>): 2308, 2274 (MeCN).

**[NdI<sub>3</sub>(18-crown-6)]**: was made similarly from NdI<sub>3</sub> (0.152 g, 0.29 mmol) and 18-crown-6 (0.076 g, 0.29 mmol). Yield 0.10 g, 44%. Required for C<sub>12</sub>H<sub>24</sub>I<sub>3</sub>NdO<sub>6</sub> (789.3): C, 18.3; H, 3.1. Found: C, 17.9; H, 3.0%. <sup>1</sup>H NMR (CD<sub>3</sub>CN, 295 K): δ = 8.53 (s). Λ<sub>M</sub> MeCN, 10<sup>-3</sup> mol dm<sup>-3</sup>: 288 Ω<sup>-1</sup> cm<sup>2</sup> mol<sup>-1</sup>.

**[CeI<sub>3</sub>(18-crown-6)]**: was made similarly. Small colourless crystals grew overnight from the filtrate. The crystals were collected by filtration and dried under vacuum. Yield 0.086 g, 38%. Required for C<sub>12</sub>H<sub>24</sub>CeI<sub>3</sub>O<sub>6</sub> (785.2): C, 18.4; H, 3.1. Found: C, 18.6; H, 3.7%. <sup>1</sup>H NMR (CD<sub>3</sub>CN, 295 K): δ = 6.92 (s). Λ<sub>M</sub> MeCN, 10<sup>-3</sup> mol dm<sup>-3</sup>: 240 Ω<sup>-1</sup> cm<sup>2</sup> mol<sup>-1</sup>.

**[La(O<sub>3</sub>SCF<sub>3</sub>)<sub>2</sub>(18-crown-6)][O<sub>3</sub>SCF<sub>3</sub>]**: In a Schlenk flask containing La(O<sub>3</sub>SCF<sub>3</sub>)<sub>3</sub> (0.100 g, 0.17 mmol) was added a solution of 18-crown-6 (0.161 g, 0.61 mmol) in MeCN (20 mL). The resulting white suspension was stirred overnight at which point a clear solution had been obtained. The solvent was removed under vacuum and then residue was triturated with dichloromethane (10 mL) and hexane (5 mL). The white microcrystalline product was collected by filtration and dried under vacuum. Yield: 0.060 g, 44%. Required for C<sub>15</sub>H<sub>24</sub>F<sub>9</sub>LaO<sub>15</sub>S<sub>3</sub> (850.4): C, 21.2; H, 2.8. Found: C, 21.3; H, 3.1%. <sup>1</sup>H NMR (CD<sub>3</sub>CN, 295 K) δ = 4.05 (s). <sup>19</sup>F{<sup>1</sup>H} NMR (CD<sub>3</sub>CN, 295 K) δ = -78.4 (s). <sup>139</sup>La NMR (CH<sub>3</sub>CN/CD<sub>3</sub>CN, 295 K): δ = -112.4 (W<sub>1/2</sub> = 3000 Hz). Λ<sub>M</sub> MeCN, 10<sup>-3</sup> mol dm<sup>-3</sup>: 163 Ω<sup>-1</sup> cm<sup>2</sup> mol<sup>-1</sup>.

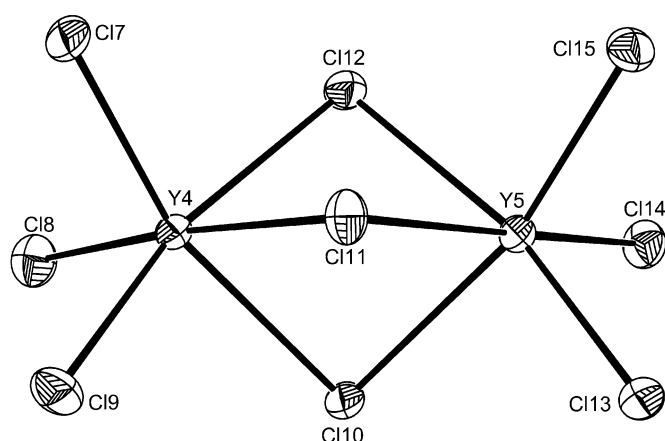

**Figure S1.** The anion in [YCl<sub>2</sub>(18-crown-6)]<sub>3</sub>[Y<sub>2</sub>Cl<sub>9</sub>]. Y–Cl (terminal) = 2.5317(15) – 2.5709(14), Y–Cl (bridge) = 2.7091(14) – 2.7468(15) Å.

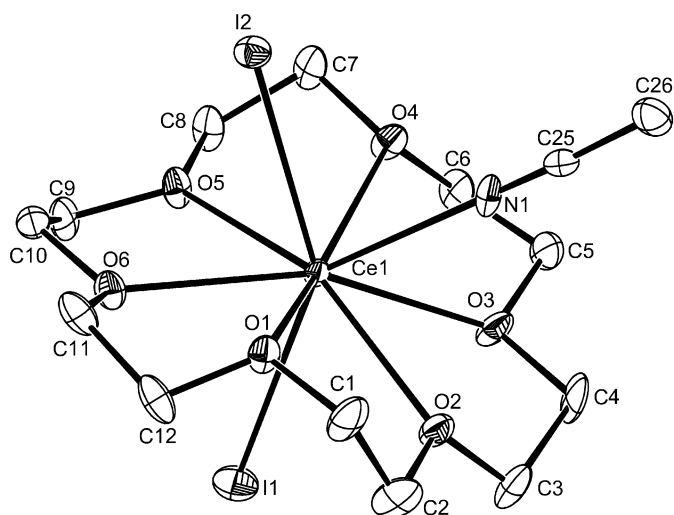

**Figure S2.** The cation in  $[\text{CeI}_2(18\text{-crown-6})(\text{MeCN})]\text{I}\cdot n\text{MeCN}$  ( $n = 1/2$ ). The displacement ellipsoids are drawn at the 50% probability level and H atoms are omitted for clarity. Selected bond lengths ( $\text{\AA}$ ) and angles ( $^\circ$ ): Ce1–O5 = 2.550(5), Ce1–I1 = 2.576(5), Ce1–O2 = 2.582(5), Ce1–O4 = 2.589(5), Ce1–O6 = 2.597(5), Ce1–N1 = 2.608(7), Ce1–O3 = 2.622(5), Ce1–I2 = 3.1886(9), Ce1–I2 = 3.2103(8), O1–Ce1–O2 = 62.82(17), O5–Ce1–O4 = 62.55(17), O1–Ce1–O6 = 2.35(17), O2–Ce1–O3 = 60.55(17), O4–Ce1–O3 = 61.79(17), N1–Ce1–I1 = 141.14(16), N1–Ce1–I2 = 70.46(16), I1–Ce1–I2 = 147.62(2). Ce(2) is very similar.

**Table S1:** Crystallographic parameters

| Compound                                | [LaI <sub>3</sub> ([18]aneO <sub>4</sub> S <sub>2</sub> )]                     | [LaI(OH) <sub>2</sub> ([18]aneO <sub>4</sub> S <sub>2</sub> )]I <sub>2</sub><br>·H <sub>2</sub> O | [LaI <sub>3</sub> ([18]aneO <sub>4</sub> Se <sub>2</sub> )]                     | [LaI <sub>3</sub> (15-crown-5)]<br>·MeCN                         | [LaI <sub>2</sub> (18-crown-6)(MeCN)]I<br>· <i>n</i> MeCN ( <i>n</i> = 0.5)        | [CeI <sub>2</sub> (18-crown-6)(MeCN)]I<br>· <i>n</i> MeCN ( <i>n</i> = 0.5)        |
|-----------------------------------------|--------------------------------------------------------------------------------|---------------------------------------------------------------------------------------------------|---------------------------------------------------------------------------------|------------------------------------------------------------------|------------------------------------------------------------------------------------|------------------------------------------------------------------------------------|
| Formula                                 | C <sub>12</sub> H <sub>24</sub> I <sub>3</sub> LaO <sub>4</sub> S <sub>2</sub> | C <sub>12</sub> H <sub>30</sub> I <sub>3</sub> LaO <sub>7</sub> S <sub>2</sub>                    | C <sub>12</sub> H <sub>24</sub> I <sub>3</sub> LaO <sub>4</sub> Se <sub>2</sub> | C <sub>12</sub> H <sub>23</sub> I <sub>3</sub> LaNO <sub>5</sub> | C <sub>15</sub> H <sub>28.5</sub> I <sub>3</sub> LaN <sub>1.5</sub> O <sub>6</sub> | C <sub>15</sub> H <sub>28.5</sub> CeI <sub>3</sub> N <sub>1.5</sub> O <sub>6</sub> |
| <i>M</i>                                | 816.04                                                                         | 870.09                                                                                            | 909.84                                                                          | 780.92                                                           | 845.50                                                                             | 846.71                                                                             |
| crystal syst                            | Orthorhombic                                                                   | Monoclinic                                                                                        | Orthorhombic                                                                    | Orthorhombic                                                     | Monoclinic                                                                         | Monoclinic                                                                         |
| Space group                             | Pbca (no. 61)                                                                  | P2 <sub>1</sub> /c (no. 14)                                                                       | Pbca (no. 61)                                                                   | Pnma (no. 62)                                                    | P2 <sub>1</sub> /c (no. 14)                                                        | P2 <sub>1</sub> /c (no. 14)                                                        |
| <i>a</i> [Å]                            | 15.276(3)                                                                      | 8.5208(16)                                                                                        | 15.375(3)                                                                       | 21.695(7)                                                        | 8.1091(11)                                                                         | 8.0939(18)                                                                         |
| <i>b</i> [Å]                            | 13.763(2)                                                                      | 20.401(4)                                                                                         | 13.506(3)                                                                       | 12.454(4)                                                        | 21.599(3)                                                                          | 21.505(5)                                                                          |
| <i>c</i> [Å]                            | 20.617(4)                                                                      | 14.616(3)                                                                                         | 21.053(4)                                                                       | 7.900(3)                                                         | 29.150(4)                                                                          | 29.104(7)                                                                          |
| <i>α</i> [deg]                          | 90                                                                             | 90                                                                                                | 90                                                                              | 90                                                               | 90                                                                                 | 90                                                                                 |
| <i>β</i> [deg]                          | 90                                                                             | 106.278(3)                                                                                        | 90                                                                              | 90                                                               | 91.469(3)                                                                          | 91.479(3)                                                                          |
| <i>γ</i> [deg]                          | 90                                                                             | 90                                                                                                | 90                                                                              | 90                                                               | 90                                                                                 | 90                                                                                 |
| <i>U</i> [Å <sup>3</sup> ]              | 4334.3(13)                                                                     | 2438.9(8)                                                                                         | 4371.8(14)                                                                      | 2134.6(12)                                                       | 5103.9(12)                                                                         | 5064.3(19)                                                                         |
| <i>Z</i>                                | 8                                                                              | 4                                                                                                 | 8                                                                               | 4                                                                | 8                                                                                  | 8                                                                                  |
| <i>μ</i> (Mo Kα)<br>[mm <sup>-1</sup> ] | 6.448                                                                          | 5.746                                                                                             | 9.533                                                                           | 6.357                                                            | 5.330                                                                              | 5.482                                                                              |
| total no. reflns                        | 20061                                                                          | 11038                                                                                             | 23251                                                                           | 10231                                                            | 23074                                                                              | 22455                                                                              |
| unique reflns                           | 4952                                                                           | 5520                                                                                              | 5010                                                                            | 2541                                                             | 11528                                                                              | 11504                                                                              |
| <i>R</i> <sub>int</sub>                 | 0.149                                                                          | 0.174                                                                                             | 0.073                                                                           | 0.136                                                            | 0.032                                                                              | 0.073                                                                              |

|                               |        |        |        |         |        |        |
|-------------------------------|--------|--------|--------|---------|--------|--------|
| no. of params,<br>restraints  | 194, 6 | 226, 0 | 199, 0 | 127, 11 | 481, 0 | 481, 0 |
| $R_1^b [I_o > 2\sigma(I_o)]$  | 0.043  | 0.067  | 0.033  | 0.054   | 0.028  | 0.059  |
| $R_1$ [all data]              | 0.047  | 0.069  | 0.043  | 0.058   | 0.035  | 0.078  |
| $wR_2^b [I_o > 2\sigma(I_o)]$ | 0.110  | 0.171  | 0.068  | 0.136   | 0.052  | 0.107  |
| $wR_2$ [all data]             | 0.113  | 0.175  | 0.073  | 0.140   | 0.054  | 0.115  |

<sup>a</sup> Common items: temperature = 100 K check; wavelength (Mo–K $\alpha$ ) = 0.71073 Å;  $\theta(\max) = 27.5^\circ$ ; <sup>b</sup>  $R_1 = \Sigma || F_o| - |F_c|| / \Sigma |F_o|$ ;  $wR_2 = [\Sigma w(F_o^2 - F_c^2)^2 / \Sigma wF_o^4]^{1/2}$ .

Table S1 cont.

|                              |                                                                                                |                                                                                |                                                                                |                                                                                   |                                                                                                                     |
|------------------------------|------------------------------------------------------------------------------------------------|--------------------------------------------------------------------------------|--------------------------------------------------------------------------------|-----------------------------------------------------------------------------------|---------------------------------------------------------------------------------------------------------------------|
| Compound                     | [LuI <sub>2</sub> ([18]aneO <sub>4</sub> Se <sub>2</sub> )]I·<br><i>n</i> MeCN ( <i>n</i> = 2) | [Lu(MeCN) <sub>2</sub> (OH <sub>2</sub> )(15-<br>crown-5)]I <sub>3</sub>       | [LuI(MeCN) <sub>2</sub> (18-crown-6)] I <sub>2</sub>                           | [YCl <sub>2</sub> ([18]aneO <sub>4</sub> S <sub>2</sub> )] [FeCl <sub>4</sub> ]   | [YCl <sub>2</sub> (18-crown-6)] <sub>3</sub><br>[Y <sub>2</sub> Cl <sub>9</sub> ]. <i>n</i> MeCN ( <i>n</i> = 1.65) |
| Formula                      | C <sub>16</sub> H <sub>30</sub> I <sub>3</sub> LuN <sub>2</sub> O <sub>4</sub> Se <sub>2</sub> | C <sub>14</sub> H <sub>28</sub> I <sub>3</sub> LuN <sub>2</sub> O <sub>6</sub> | C <sub>16</sub> H <sub>30</sub> I <sub>3</sub> LuN <sub>2</sub> O <sub>6</sub> | C <sub>12</sub> H <sub>24</sub> Cl <sub>6</sub> FeO <sub>4</sub> S <sub>2</sub> Y | C <sub>39.30</sub> H <sub>76.95</sub> Cl <sub>15</sub> N <sub>1.65</sub> O <sub>18</sub> Y <sub>5</sub>             |
| <i>M</i>                     | 1028.01                                                                                        | 876.05                                                                         | 902.09                                                                         | 653.89                                                                            | 1836.98                                                                                                             |
| crystal syst                 | Orthorhombic                                                                                   | Orthorhombic                                                                   | Monoclinic                                                                     | Orthorhombic                                                                      | Triclinic                                                                                                           |
| Space group                  | Pnma (no. 62)                                                                                  | Pnma (no.62)                                                                   | P2 <sub>1</sub> /m (no. 11)                                                    | Pccn (no. 56)                                                                     | P-1 (no. 2)                                                                                                         |
| <i>a</i> [Å]                 | 15.436(5)                                                                                      | 18.946(7)                                                                      | 8.787(4)                                                                       | 23.764(5)                                                                         | 13.174(2)                                                                                                           |
| <i>b</i> [Å]                 | 11.954(4)                                                                                      | 11.146(4)                                                                      | 10.151(4)                                                                      | 16.180(2)                                                                         | 17.299(3)                                                                                                           |
| <i>c</i> [Å]                 | 14.804(5)                                                                                      | 11.901(5)                                                                      | 14.970(6)                                                                      | 12.5376(18)                                                                       | 18.224(4)                                                                                                           |
| α [deg]                      | 90                                                                                             | 90                                                                             | 90                                                                             | 90                                                                                | 115.694(3)                                                                                                          |
| β [deg]                      | 90                                                                                             | 90                                                                             | 100.635(5)                                                                     | 90                                                                                | 95.928(5)                                                                                                           |
| Γ [deg]                      | 90                                                                                             | 90                                                                             | 90                                                                             | 90                                                                                | 91.622(1)                                                                                                           |
| <i>U</i> [Å <sup>3</sup> ]   | 2731.6(15)                                                                                     | 2513.1(16)                                                                     | 1312.4(9)                                                                      | 4820.7(14)                                                                        | 3710.0(12)                                                                                                          |
| <i>Z</i>                     | 4                                                                                              | 4                                                                              | 2                                                                              | 8                                                                                 | 2                                                                                                                   |
| μ(Mo Kα) [mm <sup>-1</sup> ] | 9.691                                                                                          | 7.640                                                                          | 7.319                                                                          | 3.851                                                                             | 4.463                                                                                                               |
| total no. reflns             | 11879                                                                                          | 12417                                                                          | 6255                                                                           | 41731                                                                             | 45947                                                                                                               |
| unique reflns                | 3265                                                                                           | 3019                                                                           | 3155                                                                           | 5515                                                                              | 17003                                                                                                               |
| <i>R</i> <sub>int</sub>      | 0.154                                                                                          | 0.125                                                                          | 0.1977                                                                         | 0.0503                                                                            | 0.1446                                                                                                              |
| no. of params,               | 148, 6                                                                                         | 128, 0                                                                         | 137, 0                                                                         | 235, 0                                                                            | 731, 6                                                                                                              |

|                               |        |        |        |        |        |
|-------------------------------|--------|--------|--------|--------|--------|
| restraints                    |        |        |        |        |        |
| $R_1^b [I_o > 2\sigma(I_o)]$  | 0.0630 | 0.0410 | 0.0868 | 0.0301 | 0.0647 |
| $R_1$ [all data]              | 0.0716 | 0.0440 | 0.0868 | 0.0419 | 0.0769 |
| $wR_2^b [I_o > 2\sigma(I_o)]$ | 0.1529 | 0.1038 | 0.2166 | 0.0627 | 0.1807 |
| $wR_2$ [all data]             | 0.1595 | 0.1061 | 0.2166 | 0.0664 | 0.1920 |

Table S1 cont.

|                                                                     |                                                                                  |                                                                                     |
|---------------------------------------------------------------------|----------------------------------------------------------------------------------|-------------------------------------------------------------------------------------|
| Compound                                                            | [ScI <sub>2</sub> ([18]aneO <sub>4</sub> S <sub>2</sub> )I<br>·MeCN              | [ScCl <sub>2</sub> ([18]aneO <sub>4</sub> S <sub>2</sub> )]<br>[FeCl <sub>4</sub> ] |
| Formula                                                             | C <sub>14</sub> H <sub>27</sub> I <sub>3</sub> NO <sub>4</sub> S <sub>2</sub> Sc | C <sub>12</sub> H <sub>24</sub> Cl <sub>6</sub> FeO <sub>4</sub> S <sub>2</sub> Sc  |
| <i>M</i>                                                            | 763.15                                                                           | 609.94                                                                              |
| crystal syst                                                        | Orthorhombic                                                                     | Orthorhombic                                                                        |
| Space group                                                         | Pnma (no.62)                                                                     | Abm2 (no. 69)                                                                       |
| A [Å]                                                               | 15.2900(10)                                                                      | 16.150(4)                                                                           |
| B [Å]                                                               | 11.9434(8)                                                                       | 64.370(8)                                                                           |
| C [Å]                                                               | 14.4913(8)                                                                       | 11.3327(12)                                                                         |
| α [deg]                                                             | 90                                                                               | 90                                                                                  |
| β [deg]                                                             | 90                                                                               | 90                                                                                  |
| Γ [deg]                                                             | 90                                                                               | 90                                                                                  |
| U [Å <sup>3</sup> ]                                                 | 2646.3(3)                                                                        | 11781(4)                                                                            |
| Z                                                                   | 4                                                                                | 20                                                                                  |
| μ(MoKα) [mm <sup>-1</sup> ]                                         | 3.951                                                                            | 1.777                                                                               |
| total no. reflns                                                    | 27355                                                                            | 69707                                                                               |
| unique reflns                                                       | 2710                                                                             | 13386                                                                               |
| R <sub>int</sub>                                                    | 0.0610                                                                           | 0.0841                                                                              |
| no. of params,<br>restraints                                        | 144,8                                                                            | 428, 10                                                                             |
| R <sub>1</sub> <sup>b</sup> [I <sub>0</sub> > 2σ(I <sub>0</sub> )]  | 0.074                                                                            | 0.0963                                                                              |
| R <sub>1</sub> [all data]                                           | 0.100                                                                            | 0.1288                                                                              |
| wR <sub>2</sub> <sup>b</sup> [I <sub>0</sub> > 2σ(I <sub>0</sub> )] | 0.188                                                                            | 0.2292                                                                              |
| wR <sub>2</sub> [all data]                                          | 0.206                                                                            | 0.2517                                                                              |
